# Supplementary material for: Intestinal microbiome composition and its relation to joint pain and inflammation
Source: PubMed Central journal article supplement (PMC6814863; doi:10.1038/s41467-019-12873-4), 2019-10-25
Supplement: 41467_2019_12873_MOESM1_ESM.pdf [file 41467_2019_12873_MOESM1_ESM.pdf]

# Intestinal microbiome composition and its relation to joint pain and inflammation

Boer *et al.*

## Supplementary Information:

### Supplementary Figures:

**Supplementary Figure 1:** PCA plot of Aitchison distances of inter-individual microbial composition in the Rotterdam Study - Page 2

**Supplementary figure 2:** Spearman correlation between 16s sequencing and qPCR *Streptococcus* relative abundancies in the Rotterdam Study – Page 3

### Supplementary Tables:

**Supplementary Table 1:** Association results of  $\alpha$ -diversity metrics and  $\beta$ -diversity with Knee OA pain and severity in the Rotterdam Study – Page 4

**Supplementary Table 2:** streptococcus spp. association with WOMAC-knee pain score in Rotterdam Study is independent of alcohol use, smoking and BMI – Page 5

**Supplementary Table 3:** Streptococcus spp. association with WOMAC-knee pain score in Rotterdam Study. CEU ancestry only- Page 6

**Supplementary Table 4:** Streptococcus spp. association with WOMAC-knee pain score in Rotterdam Study is not driven by oral medication use – Page 7

**Supplementary Table 5:** Increased Streptococcus spp. associated with increased WOMAC-knee-pain- Page 8

**Supplementary Table 6:** Streptococcus spp. Association with WOMAC-pain score when using ILR and ARS transformation – Page 9

**Supplementary Table 7:** General characteristics of the replication cohort Lifelines Deep – Page 10

**Supplementary Table 8:** Increased relative abundancy of Streptococcus is associated with increased Knee WOMAC-pain score, when adjusting for BMI – Page 11

**Supplementary Table 9:** List of all Primers used in this study – Page 12

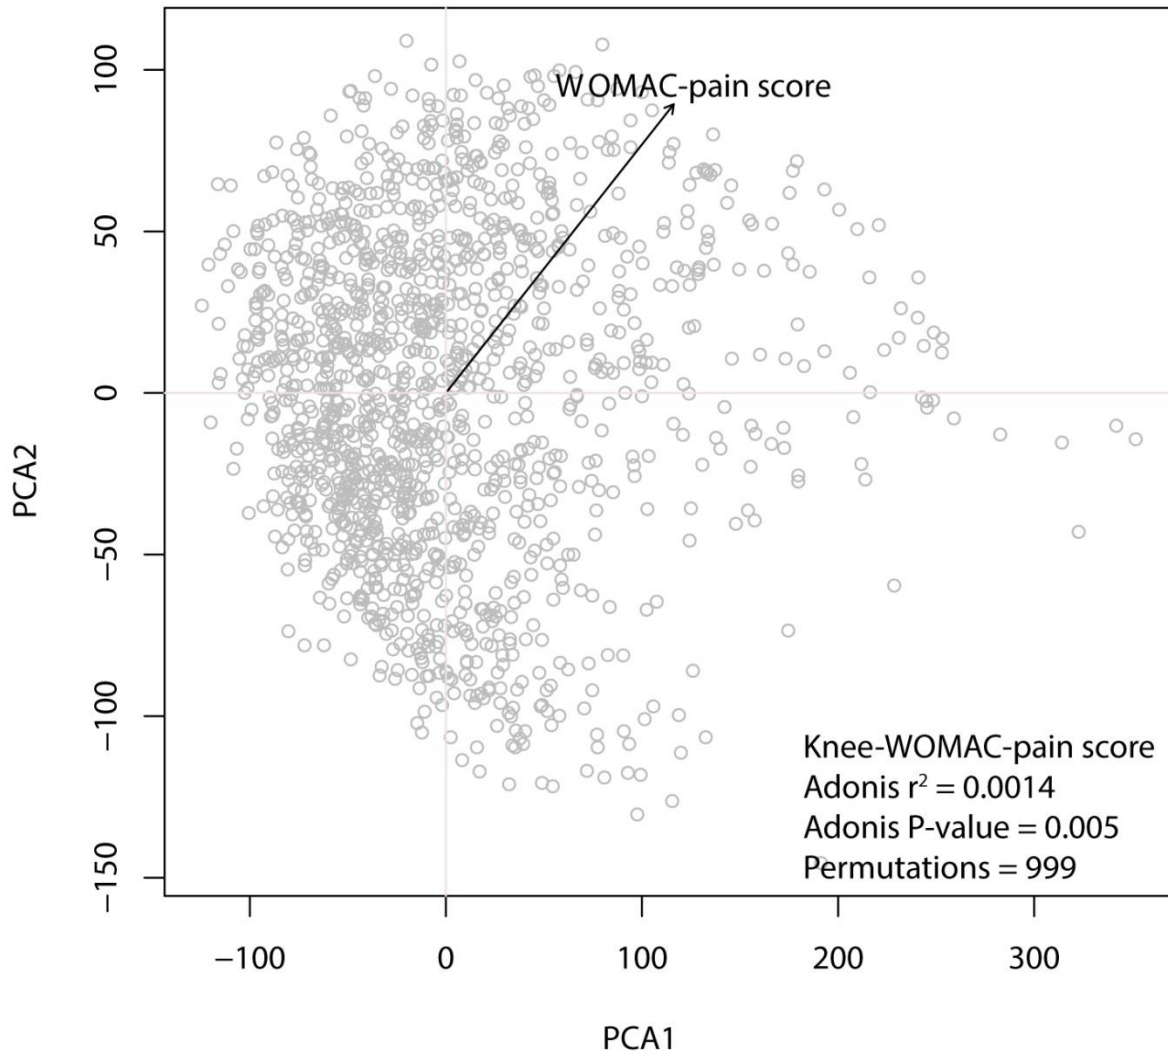

**Supplementary Figure 1:** PCA plot of Aitchison s distances of inter-individual microbial composition in the Rotterdam Study. With plotted vector of knee WOMAC-pain score. PERMANOVA P-value calculated through VEGAN R package ADONIS function, permutations=999, n=1,427

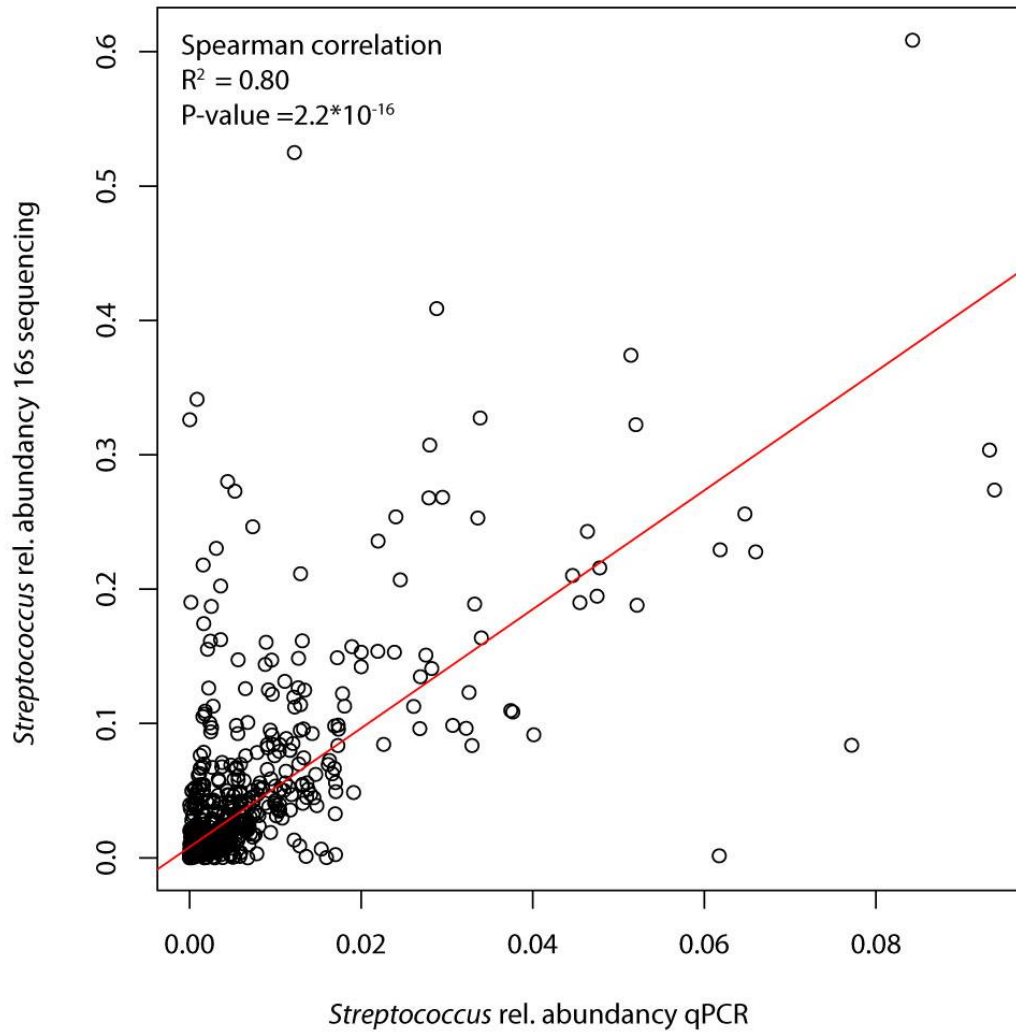

**Supplementary Figure 2:** Spearman correlation between 16s sequencing and qPCR *Streptococcus* relative abundancies in the Rotterdam Study. Spearman correlation between relative *Streptococcus spp.* abundance determined by 16S rRNA sequencing and quantitative *Streptococcus spp.* abundance determined by qPCR, in the Rotterdam study microbiome. Red line depicts the regression line (16S sequencing abundance ~ qPCR abundance), N=1,427

**Supplementary Table 1:** Association results of  $\alpha$ -diversity metrics and  $\beta$ -diversity with Knee OA pain and severity in the Rotterdam Study

|                              | Knee KLSum               |         | Knee WOMAC pain          |                         |
|------------------------------|--------------------------|---------|--------------------------|-------------------------|
|                              | Beta / r <sup>2</sup>    | P-Value | Beta / r <sup>2</sup>    | P-value                 |
| <b>Shannon index</b>         | -9.5 * 10 <sup>-02</sup> | 0.31    | -2.3 * 10 <sup>-01</sup> | 0.07                    |
| <b>Inverse Simpson index</b> | -1.6 * 10 <sup>-03</sup> | 0.69    | -8.9 * 10 <sup>-03</sup> | 0.13                    |
| <b>B-diversity</b>           | 1.39 * 10 <sup>-03</sup> | 0.09    | 1.4 * 10 <sup>-03</sup>  | 5.0 * 10 <sup>-03</sup> |

$\alpha$ -diversity metrics used are the Shannon Index, Inverse Simpson Index. Knee KLSum is the sum of the Kellgren-Lawrence score in the left knee and right knee. WOMAC-pain score is a sum of the WOMAC pain questionnaire question for the left and right knee. Poisson regression model was used. For Beta-diversity we calculated the Aitchison distance from CLR normalized data, P-values and r<sup>2</sup> were calculated using adonis PERMANOVA for 999 iterations. All analysis used were adjusted for adjusted for age, sex, TimeInMail and Batch

**Supplementary Table 2:** Streptococcus spp. association with WOMAC-knee pain score in Rotterdam Study is independent of alcohol use, smoking and BMI

|                                             |       | Model 1                      |                        |                        | Model 2                     |                        |                        | Model 3                |                        |                       |
|---------------------------------------------|-------|------------------------------|------------------------|------------------------|-----------------------------|------------------------|------------------------|------------------------|------------------------|-----------------------|
|                                             |       | Age + Sex + Technical CoVar. |                        |                        | Model 1 + Smoking + Alcohol |                        |                        | Model 2 + BMI          |                        |                       |
| Taxonomy                                    | N     | CoE                          | P-Value                | FDR                    | CoE                         | P-Value                | FDR                    | CoE                    | P-Vale                 | FDR                   |
| <b>Class</b> . / <i>Bacilli</i>             | 1,419 | 6.07*10 <sup>-03</sup>       | 9.06*10 <sup>-09</sup> | 2.32*10 <sup>-06</sup> | 5.81*10 <sup>-03</sup>      | 3.19*10 <sup>-08</sup> | 8.16*10 <sup>-06</sup> | 5.00*10 <sup>-03</sup> | 2.44*10 <sup>-06</sup> | 6.3*10 <sup>-04</sup> |
| <b>Order</b> .. / <i>Lactobacillales</i>    | 1,417 | 6.11*10 <sup>-03</sup>       | 7.61*10 <sup>-09</sup> | 2.32*10 <sup>-06</sup> | 5.85*10 <sup>-03</sup>      | 2.65*10 <sup>-08</sup> | 8.16*10 <sup>-06</sup> | 5.03*10 <sup>-03</sup> | 2.20*10 <sup>-06</sup> | 6.3*10 <sup>-04</sup> |
| <b>Family</b> ... / <i>Streptococcaceae</i> | 1,402 | 4.91*10 <sup>-03</sup>       | 1.52*10 <sup>-07</sup> | 1.94*10 <sup>-05</sup> | 4.70*10 <sup>-03</sup>      | 4.52*10 <sup>-07</sup> | 5.78*10 <sup>-05</sup> | 4.01*10 <sup>-03</sup> | 2.10*10 <sup>-05</sup> | 2.7*10 <sup>-03</sup> |
| <b>Genus</b> .... / <i>Streptococcus</i>    | 1,396 | 5.04*10 <sup>-03</sup>       | 7.28*10 <sup>-08</sup> | 1.24*10 <sup>-05</sup> | 4.83*10 <sup>-03</sup>      | 2.20*10 <sup>-07</sup> | 3.76*10 <sup>-05</sup> | 4.13*10 <sup>-03</sup> | 1.22*10 <sup>-05</sup> | 2.1*10 <sup>-03</sup> |

MaAslin results for Streptococcus WOMAC-pain score association. FDR is based on full dataset (256 taxonomies). Model 1: the base model of WOMAC + age + sex + technical covariates (Technical CoVar: Time in mail + Batch). Model 2 : the base model with Alcohol use and smoking added. Model 3: model 2 with BMI added. T.Covar: technical Covariates, CoE: Coefficient, FDR: Benjamin-Hochberg FDR multiple testing corrected P-value, BMI: Body Mass Index. Analysis done on full dataset (256 taxonomies). P-value, FDR and CoE from MaAslin analysis.

**Supplementary Table 3:** Streptococcus spp. association with WOMAC-knee pain score in Rotterdam Study. CEU ancestry only.

|                                             |       | Model 1                      |                        |                        | Model 2                     |                        |                        | Model 3                |                        |                        |
|---------------------------------------------|-------|------------------------------|------------------------|------------------------|-----------------------------|------------------------|------------------------|------------------------|------------------------|------------------------|
|                                             |       | Age + Sex + Technical CoVar. |                        |                        | Model 1 + Smoking + Alcohol |                        |                        | Model 2 + BMI          |                        |                        |
| Taxonomy                                    | N     | CoE                          | P-Value                | FDR                    | CoE                         | P-Value                | FDR                    | CoE                    | P-Vale                 | FDR                    |
| <b>Class</b> . / <i>Bacilli</i>             | 1,257 | 5.83*10 <sup>-03</sup>       | 7.58*10 <sup>-08</sup> | 9.70*10 <sup>-06</sup> | 5.67*10 <sup>-03</sup>      | 1.54*10 <sup>-07</sup> | 1.98*10 <sup>-05</sup> | 5.11*10 <sup>-03</sup> | 3.06*10 <sup>-06</sup> | 3.92*10 <sup>-04</sup> |
| <b>Order</b> .. / <i>Lactobacillales</i>    | 1,255 | 5.87*10 <sup>-03</sup>       | 6.46*10 <sup>-08</sup> | 9.70*10 <sup>-06</sup> | 5.72*10 <sup>-03</sup>      | 1.30*10 <sup>-07</sup> | 1.98*10 <sup>-05</sup> | 5.14*10 <sup>-03</sup> | 2.77*10 <sup>-06</sup> | 3.92*10 <sup>-04</sup> |
| <b>Family</b> ... / <i>Streptococcaceae</i> | 1,243 | 5.06*10 <sup>-03</sup>       | 2.98*10 <sup>-07</sup> | 2.54*10 <sup>-05</sup> | 4.94*10 <sup>-03</sup>      | 5.65*10 <sup>-07</sup> | 4.82*10 <sup>-05</sup> | 4.43*10 <sup>-03</sup> | 9.39*10 <sup>-06</sup> | 8.02*10 <sup>-04</sup> |
| <b>Genus</b> .... / <i>Streptococcus</i>    | 1,237 | 4.99*10 <sup>-03</sup>       | 9.05*10 <sup>-07</sup> | 5.79*10 <sup>-05</sup> | 4.86*10 <sup>-03</sup>      | 1.66*10 <sup>-06</sup> | 1.06*10 <sup>-04</sup> | 4.30*10 <sup>-03</sup> | 2.91*10 <sup>-05</sup> | 1.86*10 <sup>-03</sup> |

MaAslin results for Streptococcus WOMAC-pain score association on individuals with CEU ancestry only. CEU (central european ancestry) was determined by genetic principal components. Individuals with a minimum of 50% CEU ancestry were included. FDR is based on full dataset (256 taxonomies). Model 1: the base model of WOMAC + age + sex + technical covariates (Technical CoVar: Time in mail + Batch). Model 2 : the base model with Alcohol use and smoking added. Model 3: model 2 with BMI added. T.Covar: technical Covariates, CoE: Coefficient, FDR: Benjamin-Hochberg FDR multiple testing corrected P-value, based on full dataset (256 taxonomies), BMI: Body Mass Index. P-value, FDR, CoE from MaAslin analysis.

**Supplementary Table 4:** Streptococcus spp. association with WOMAC-knee pain score in Rotterdam Study is not driven by oral medication use

| Taxonomy                                    | N     | Model 3                |                        | Model 3                |                        | Model 3                |                        | Model 3                  |                        |                        |
|---------------------------------------------|-------|------------------------|------------------------|------------------------|------------------------|------------------------|------------------------|--------------------------|------------------------|------------------------|
|                                             |       | + NSAID use            |                        | + PPI use              |                        | + NSAID use + PPI use  |                        | + Exclusion of PPI users |                        |                        |
|                                             |       | CoE                    | P-value                | CoE                    | P-value                | CoE                    | P-value                | N                        | CoE                    | P-value                |
| <b>Class</b> . / <i>Bacilli</i>             | 1,419 | 5.09*10 <sup>-03</sup> | 2.04*10 <sup>-06</sup> | 4.20*10 <sup>-03</sup> | 4.06*10 <sup>-05</sup> | 4.16*10 <sup>-03</sup> | 5.25*10 <sup>-05</sup> | 1,123                    | 3.25*10 <sup>-03</sup> | 7.96*10 <sup>-04</sup> |
| <b>Order</b> .. / <i>Lactobacillales</i>    | 1,417 | 5.11*10 <sup>-03</sup> | 1.90*10 <sup>-06</sup> | 4.22*10 <sup>-03</sup> | 3.76*10 <sup>-05</sup> | 4.18*10 <sup>-03</sup> | 4.89*10 <sup>-05</sup> | 1,121                    | 3.31*10 <sup>-03</sup> | 6.29*10 <sup>-04</sup> |
| <b>Family</b> ... / <i>Streptococcaceae</i> | 1,402 | 4.06*10 <sup>-03</sup> | 1.98*10 <sup>-05</sup> | 3.32*10 <sup>-03</sup> | 2.65*10 <sup>-04</sup> | 3.27*10 <sup>-03</sup> | 3.61*10 <sup>-04</sup> | 1,109                    | 2.38*10 <sup>-03</sup> | 3.67*10 <sup>-03</sup> |
| <b>Genus</b> .... / <i>Streptococcus</i>    | 1,396 | 4.17*10 <sup>-03</sup> | 1.22*10 <sup>-05</sup> | 3.43*10 <sup>-03</sup> | 1.66*10 <sup>-04</sup> | 3.37*10 <sup>-03</sup> | 2.38*10 <sup>-04</sup> | 1,104                    | 2.40*10 <sup>-03</sup> | 3.97*10 <sup>-03</sup> |

MaAslin results for Streptococcus WOMAC-pain score association. Model 3: base model of WOMAC + age + sex + technical covariates with smoking, alcohol consumption and BMI added. T.Covar: technical Covariates, CoE: Coefficient, BMI: Body Mass Index. NSAID: non-steroidal anti-inflammatory drugs, and PPI: Proton Pump Inhibitors. N: nr of individuals in the analysis. P-value and CoE from MaAslin analysis.

**Supplementary Table 5:** Increased *Streptococcus* spp. associated with increased WOMAC-knee-pain score is not driven by WOMAC distribution or outliers

| Taxonomy                                    | WOMAC-Pain (>0) |                        |                        |                        |                        | WOMAC-Pain (<10) |                        |                        |                        |                        |
|---------------------------------------------|-----------------|------------------------|------------------------|------------------------|------------------------|------------------|------------------------|------------------------|------------------------|------------------------|
|                                             | N               | Model 1                |                        | Model 3                |                        | N                | Model 1                |                        | Model 3                |                        |
|                                             |                 | CoE                    | P-value                | CoE                    | P-value                |                  | CoE                    | P-value                | CoE                    | P-value                |
| <b>Class</b> . / <i>Bacilli</i>             | 313             | 5.34*10 <sup>-03</sup> | 9.90*10 <sup>-03</sup> | 4.29*10 <sup>-03</sup> | 3.97*10 <sup>-02</sup> | 1,392            | 5.67*10 <sup>-03</sup> | 2.00*10 <sup>-05</sup> | 4.49*10 <sup>-03</sup> | 7.40*10 <sup>-04</sup> |
| <b>Order</b> .. / <i>Lactobacillales</i>    | 312             | 5.34*10 <sup>-03</sup> | 1.01*10 <sup>-02</sup> | 4.27*10 <sup>-03</sup> | 4.10*10 <sup>-02</sup> | 1,390            | 5.70*10 <sup>-03</sup> | 1.88*10 <sup>-05</sup> | 4.50*10 <sup>-03</sup> | 7.29*10 <sup>-04</sup> |
| <b>Family</b> ... / <i>Streptococcaceae</i> | 309             | 6.06*10 <sup>-03</sup> | 7.51*10 <sup>-04</sup> | 5.40*10 <sup>-03</sup> | 3.14*10 <sup>-03</sup> | 1,375            | 4.39*10 <sup>-03</sup> | 3.13*10 <sup>-04</sup> | 3.41*10 <sup>-03</sup> | 5.31*10 <sup>-03</sup> |
| <b>Genus</b> .... / <i>Streptococcus</i>    | 306             | 6.25*10 <sup>-03</sup> | 5.29*10 <sup>-04</sup> | 5.56*10 <sup>-03</sup> | 2.38*10 <sup>-03</sup> | 1,369            | 4.53*10 <sup>-03</sup> | 2.03*10 <sup>-04</sup> | 3.53*10 <sup>-03</sup> | 3.93*10 <sup>-03</sup> |

Model 1: WOMAC score knee adjusted for age, sex and technical covariates. Model 3: model 1 adjusted for smoking, alcohol use and BMI. CoE: Coefficient, FDR: Benjamin-Hochberg FDR multiple testing corrected P-value, based on full analysis (248 taxonomies) in MaAslin, N = nr of individuals included in the analysis



**Supplementary table 6:** Streptococcus spp. Association with WOMAC-pain score when using ILR and ARS transformation

|                                          |               |          | <b>Model 1</b>                     |                        | <b>Model 2</b>                           |                        | <b>Model 3</b>                |                        |
|------------------------------------------|---------------|----------|------------------------------------|------------------------|------------------------------------------|------------------------|-------------------------------|------------------------|
|                                          |               |          | <b>Age + Sex + Technical CoVar</b> |                        | <b>Model 1 + Alcohol + Smoking + BMI</b> |                        | <b>Model 3 + NSAIDs + PPI</b> |                        |
| <b>Taxonomy</b>                          | <b>Method</b> | <b>N</b> | <b>CoE</b>                         | <b>P-value</b>         | <b>CoE</b>                               | <b>P-value</b>         | <b>CoE</b>                    | <b>P-value</b>         |
| <b>Genus .... / <i>Streptococcus</i></b> | ARS           | 1,395    | 5.04*10 <sup>-03</sup>             | 7.28*10 <sup>-08</sup> | 4.13*10 <sup>-03</sup>                   | 1.22*10 <sup>-05</sup> | 2.40*10 <sup>-03</sup>        | 3.97*10 <sup>-03</sup> |
| <b>Genus .... / <i>Streptococcus</i></b> | ILR           | 1,395    | 9.28*10 <sup>-02</sup>             | 9.87*10 <sup>-06</sup> | 7.01*10 <sup>-02</sup>                   | 8.35*10 <sup>-04</sup> | 5.38*10 <sup>-02</sup>        | 8.49*10 <sup>-03</sup> |

ARS: arcsine square root transformation applied in MaAslin analysis, ILR: isometric log ratio transformation, ILR was done on full genus level taxonomy dataset. CoE: coefficient, Technical CoVar: technical covariates consisting of TimeInMail and Batch. P-value and CoE, from MaAslin analysis.

**Supplementary Table 7:** General characteristics of the replication cohort Lifelines Deep

| <b>General Characteristics</b>               | <b>Females</b>             | <b>Males</b>               | <b>Total</b>           |
|----------------------------------------------|----------------------------|----------------------------|------------------------|
| <b>Cohort participants</b>                   | 505                        | 362                        | 867                    |
| <b>Age (years)</b>                           | 45.6(12.9)                 | 45.7(13.2)                 | 45.6(13)               |
| <b>BMI (Kg/m<sup>2</sup>)</b>                | 25.1(4.6)                  | 25.4(3.4)                  | 25.2(4.2)              |
| <b>Alcohol (gram/day)</b>                    | 6.2(6.6)                   | 10.8(11.1)                 | 8.1(9)                 |
| <b>Smoking (y/n)</b>                         | 87 smokers/416 non-smokers | 58 smokers/303 non-smokers | 145 current smokers    |
| <b>PPI (y/n)</b>                             | 42 users/444 non-users     | 22 users/326 non-users     | 64 current PPI users   |
| <b>NSAIDs (y/n)</b>                          | 17 users/469 non-users     | 11 users/337 non-users     | 28 current NSAID users |
| <b>Knee Phenotypes</b>                       |                            |                            |                        |
| <b>Knee OA (y/n)</b>                         | x                          | x                          | x                      |
| <b>KLSum score</b>                           | x                          | x                          | x                      |
| <b>WOMAC-Pain score</b>                      | 1.2(2.8)                   | 0.5(1.7)                   | 0.9(2.4)               |
| <b>WOMAC-Pain score &gt; 0</b>               | 133                        | 64                         | 197                    |
| <b><math>\alpha</math>-diversity metrics</b> |                            |                            |                        |
| <b>Shannon Index</b>                         | 3.8(0.4)                   | 3.7(0.3)                   | 3.7(0.4)               |
| <b>Inverse Simpson Index</b>                 | 22.2(8)                    | 20.9(7.2)                  | 21.7(7.7)              |

PPI: Proton Pump Inhibitor, BMI: Body Mass Index, NSAID: non-steroidal anti-inflammatory drugs, Klscore: Kellgren-Lawrence sum score of the knee joints

**Supplementary Table 8.** Increased relative abundance of Streptococcus is associated with increased Knee WOMAC-pain score, when adjusting for BMI

| Taxonomy                                    | %     | N     | Rotterdam Study        |                        |                        | Life Lines Deep |                        |                        | Meta-Analysis          |       |                       |
|---------------------------------------------|-------|-------|------------------------|------------------------|------------------------|-----------------|------------------------|------------------------|------------------------|-------|-----------------------|
|                                             |       |       | CoE                    | SE                     | P-Value                | N               | CoE                    | SE                     | P-value                | N     | P-Vale                |
| <b>Class</b> . / <i>Bacilli</i>             | 27.3% | 1,419 | 5.17*10 <sup>-03</sup> | 1.06*10 <sup>-03</sup> | 1.21*10 <sup>-06</sup> | 867             | 5.14*10 <sup>-03</sup> | 1.30*10 <sup>-03</sup> | 8.47*10 <sup>-05</sup> | 2,286 | 3.5*10 <sup>-10</sup> |
| <b>Order</b> .. / <i>Lactobacillales</i>    | 100%  | 1,417 | 5.20*10 <sup>-03</sup> | 1.06*10 <sup>-03</sup> | 1.10*10 <sup>-06</sup> | 864             | 4.53*10 <sup>-03</sup> | 1.33*10 <sup>-03</sup> | 6.82*10 <sup>-04</sup> | 2,281 | 2.6*10 <sup>-09</sup> |
| <b>Family</b> ... / <i>Streptococcaceae</i> | 79.6% | 1,402 | 4.16*10 <sup>-03</sup> | 9.43*10 <sup>-04</sup> | 1.12*10 <sup>-05</sup> | 863             | 2.72*10 <sup>-03</sup> | 1.28*10 <sup>-03</sup> | 3.47*10 <sup>-02</sup> | 2,265 | 1.5*10 <sup>-06</sup> |
| <b>Genus</b> .... / <i>Streptococcus</i>    | 98.7% | 1,396 | 4.28*10 <sup>-03</sup> | 9.45*10 <sup>-04</sup> | 6.41*10 <sup>-06</sup> | 860             | 3.03*10 <sup>-03</sup> | 1.59*10 <sup>-03</sup> | 5.74*10 <sup>-02</sup> | 2,256 | 1.1*10 <sup>-06</sup> |

MaAslin analysis results, adjusted for age, sex, technical covariates: DNA isolation batch and time In mail, and BMI. Rotterdam Study (n=1,427), Life Lines Deep (n=867), Meta-analysis: Rotterdam Study and Life Lines Deep together, weighted meta-analysis in METAL. Taxonomy% = percentage of taxonomy is from one taxonomy level higher, ex. 23.7% of all Firmicutes are Bacilli. N = number of individuals in cohort where microbial abundance is not zero for that taxonomy. FDR: P-value adjusted for multiple testing, Benjamin-Hochberg False Discovery Rate, CoE: Coefficient, SE: Standard Error.

**Supplementary Table 9:** List of all primers used in this study

| <b>Primer</b>  | <b>Sequence</b>       | <b>Target</b> | <b>Ref</b>     |
|----------------|-----------------------|---------------|----------------|
| <b>319F</b>    | ACTCCTACGGGAGGCAGCAG  | V3 region     | <sup>1</sup>   |
| <b>515F</b>    | GTGCCAGCMGCCGCGGTAA   | V4 region     | <sup>2</sup>   |
| <b>806R</b>    | GGACTACHVGGGTWTCTAAT  | V4 region     | <sup>1,2</sup> |
| <b>U16SRTF</b> | ACTCCTACGGGAGGCAGCAGT | 16S           | <sup>3</sup>   |
| <b>U16SRTR</b> | TATTACCGCGGCTGCTGGC   | 16S           | <sup>3</sup>   |

V3/V4 regions: hypervariable region 3,4 of the bacterial 16S rRNA gene, 16S: bacterial 16S rRNA gene.

References:

1. Fadrosh, D. W. et al. An improved dual-indexing approach for multiplexed 16S rRNA gene sequencing on the Illumina MiSeq platform. *Microbiome* 2, 6 (2014).
2. Fu, J. et al. The Gut Microbiome Contributes to a Substantial Proportion of the Variation in Blood Lipids. *Circ. Res.* 117, 817–824 (2015).
3. Clifford, R. J. et al. Detection of Bacterial 16S rRNA and Identification of Four Clinically Important Bacteria by Real-Time PCR. *PLoS One* 7, e48558 (2012).
